# Supplementary material for: NMR-Based Metabolomics Identify Metabolic Change in Spleen of Idiopathic Thrombocytopenic Purpura Patients
Source: MDPI journal article supplement (doi:10.3390/metabo12060565), 2022-06-19
Supplement: s1 [file s1]

Table S1 Identified metabolites from <sup>1</sup>H HR-MAS spectra of spleen from the

| ITP patients and the normal |             |                             |
|-----------------------------|-------------|-----------------------------|
| Metabolites                 | Abbr.       | Chemical shift*             |
| 3-Hydroxybutyrate           | 3-HB        | 1.2d, 2.3m, 2.41m, 4.16m    |
| Acetate                     | Ace         | 1.92s                       |
| Adenine                     | Ade         | 8.18s, 8.21s                |
| Alanine                     | Ala         | 1.48d                       |
| Ascorbate                   | Asc         | 4.52d                       |
| Asparagine                  | Asn         | 2.86dd, 2.95dd, 3.95dd      |
| Aspartate                   | Asp         | 2.68dd, 2.82dd, 3.98dd      |
| Choline                     | Ch          | 3.2s                        |
| Creatine                    | Cr          | 3.04s, 3.93s                |
| Ethanol                     | Eth         | 1.19t                       |
| Ethanolamine                | EA          | 3.13t, 3.83t                |
| Formate                     | For         | 8.46s                       |
| Fumarate                    | Fum         | 6.52s                       |
| Glutamate                   | Glu         | 2.07m, 2.12m, 2.35m         |
| Glutamine                   | Gln         | 2.14m, 2.45m                |
| Glycerol                    | G           | 3.58m, 3.66m, 3.79m         |
| Glycerophosphocholine       | GPC         | 3.23s, 3.67m                |
| Glycine                     | Gly         | 3.56m                       |
| Glycogen                    | Glg         | 5.42m                       |
| Histidine                   | His         | 7.1s, 7.89s                 |
| Inosine                     | Ino         | 6.1s, 8.18s, 8.38s          |
| Isoleucine                  | Ile         | 0.94t, 1.01d                |
| Lactate                     | Lac         | 1.33d, 4.11q                |
| LDL-1                       | L1          | 0.89br                      |
| LDL-2                       | L2          | 1.29br                      |
| Leucine                     | Leu         | 0.96t, 1.7m                 |
| Lipid                       | Lipid       | 2.26br, 5.32br              |
| Lysine                      | Lys         | 1.73m, 1.93m, 3.03t, 3.763t |
| Malonate                    | M           | 3.11s                       |
| Methanol                    | Mol         | 3.34s                       |
| Methionine                  | Met         | 2.14s, 2.16m, 2.65t         |
| <i>myo</i> -Inositol        | <i>m</i> -I | 3.54dd, 3.62t, 4.07t        |
| Phenylalanine               | Phe         | 7.33d, 7.38t, 7.43m         |
| Phosphocholine              | PC          | 3.21s                       |
| Pyroglutamate               | Pglu        | 2.02m, 2.54m, 4.18m         |
| Pyruvate                    | Py          | 2.373s                      |
| Taurine                     | Tau         | 3.27t, 3.43t                |
| Threonine                   | Threonine   | 4.26m                       |
| Trigonelline                | TG          | 4.42s                       |
| Trimethylamine N-oxide      | TMAO        | 3.29s                       |

|               |               |                                                      |
|---------------|---------------|------------------------------------------------------|
| Tyrosine      | Tyr           | 6.895d, 7.19d                                        |
| Uracil        | Ura           | 7.54d                                                |
| Valine        | Val           | 0.99d                                                |
| alpha-Glucose | $\alpha$ -Glc | 3.42t, 3.71t, 3.74m, 3.84m, 5.24d                    |
| beta-Glucose  | $\beta$ -Glc  | 3.26dd, 3.41t, 3.46m, 3.49t, 3.73dd, 3.9dd,<br>4.65d |

---

\*: s, single peak; d, double peak; dd: dual double peak; t, triple peak; m, multiple; br, broad peak
